# Supplementary material for: Risk of SARS-CoV-2 transmission from on-field player contacts in amateur, youth and professional football (soccer)
Source: HighWire-hosted journal article supplement (doi:10.1136/bjsports-2021-104441), 2021-10-18
Supplement: bjsports-2021-104441supp002_data_supplement.pdf [file bjsports-2021-104441supp002_data_supplement.pdf]

**S2. Football players (n=62) with COVID-19 related symptoms ( $\geq 2$  per player) during the acute phase of the disease.**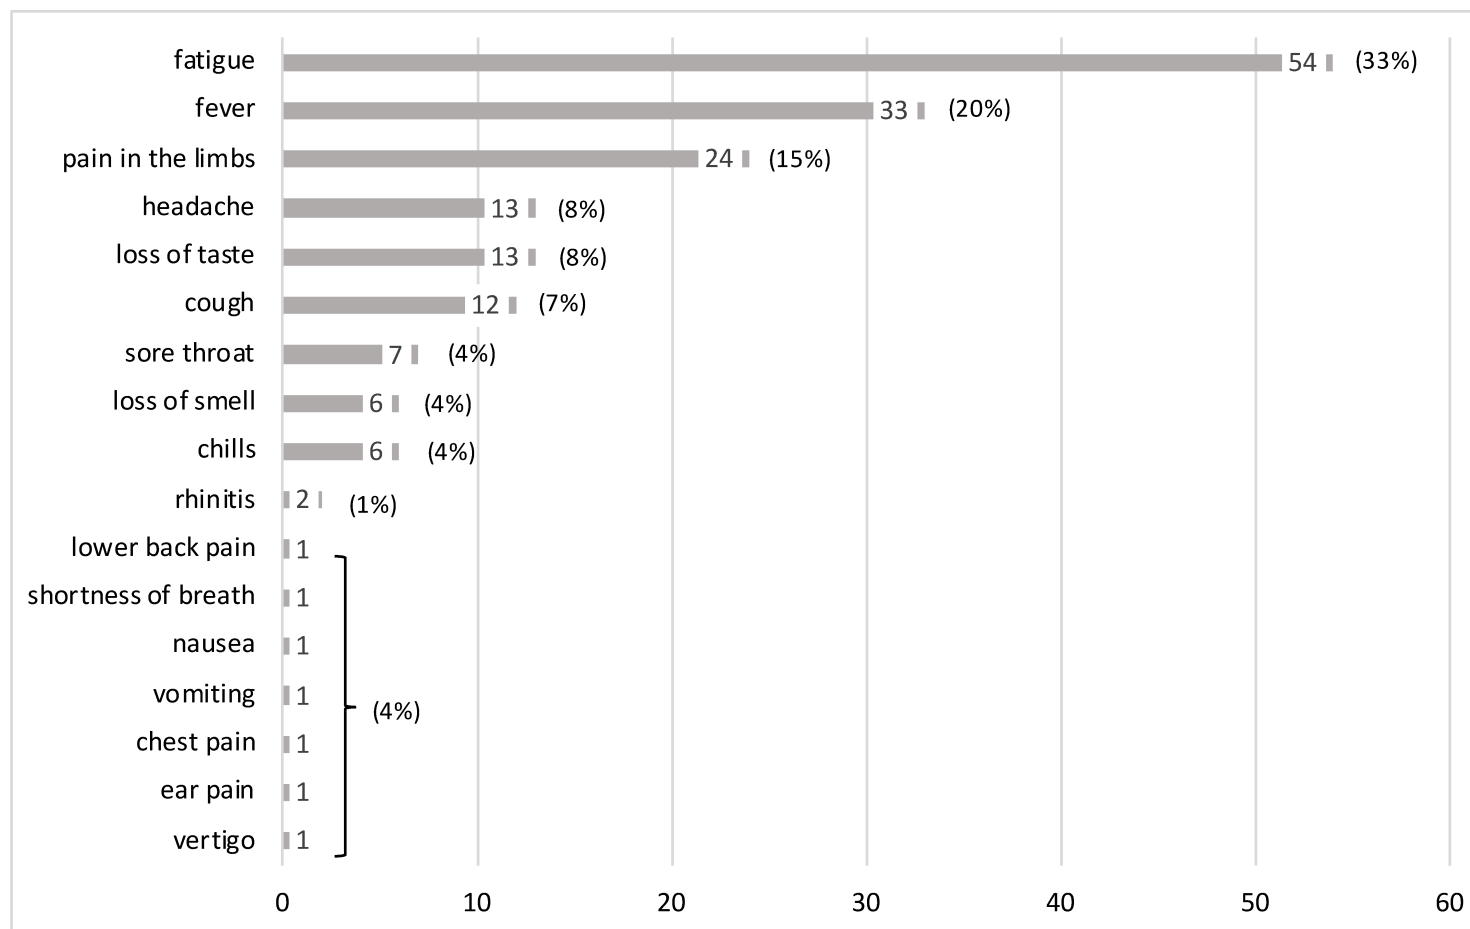

(%) percentage of 165 potentially infectious football players
