# Supplementary material for: Risk of SARS-CoV-2 transmission from on-field player contacts in amateur, youth and professional football (soccer)
Source: HighWire-hosted journal article supplement (doi:10.1136/bjsports-2021-104441), 2021-10-18

**S3. Symptom monitoring of exposed players within 14 days after match or training in amateur football.**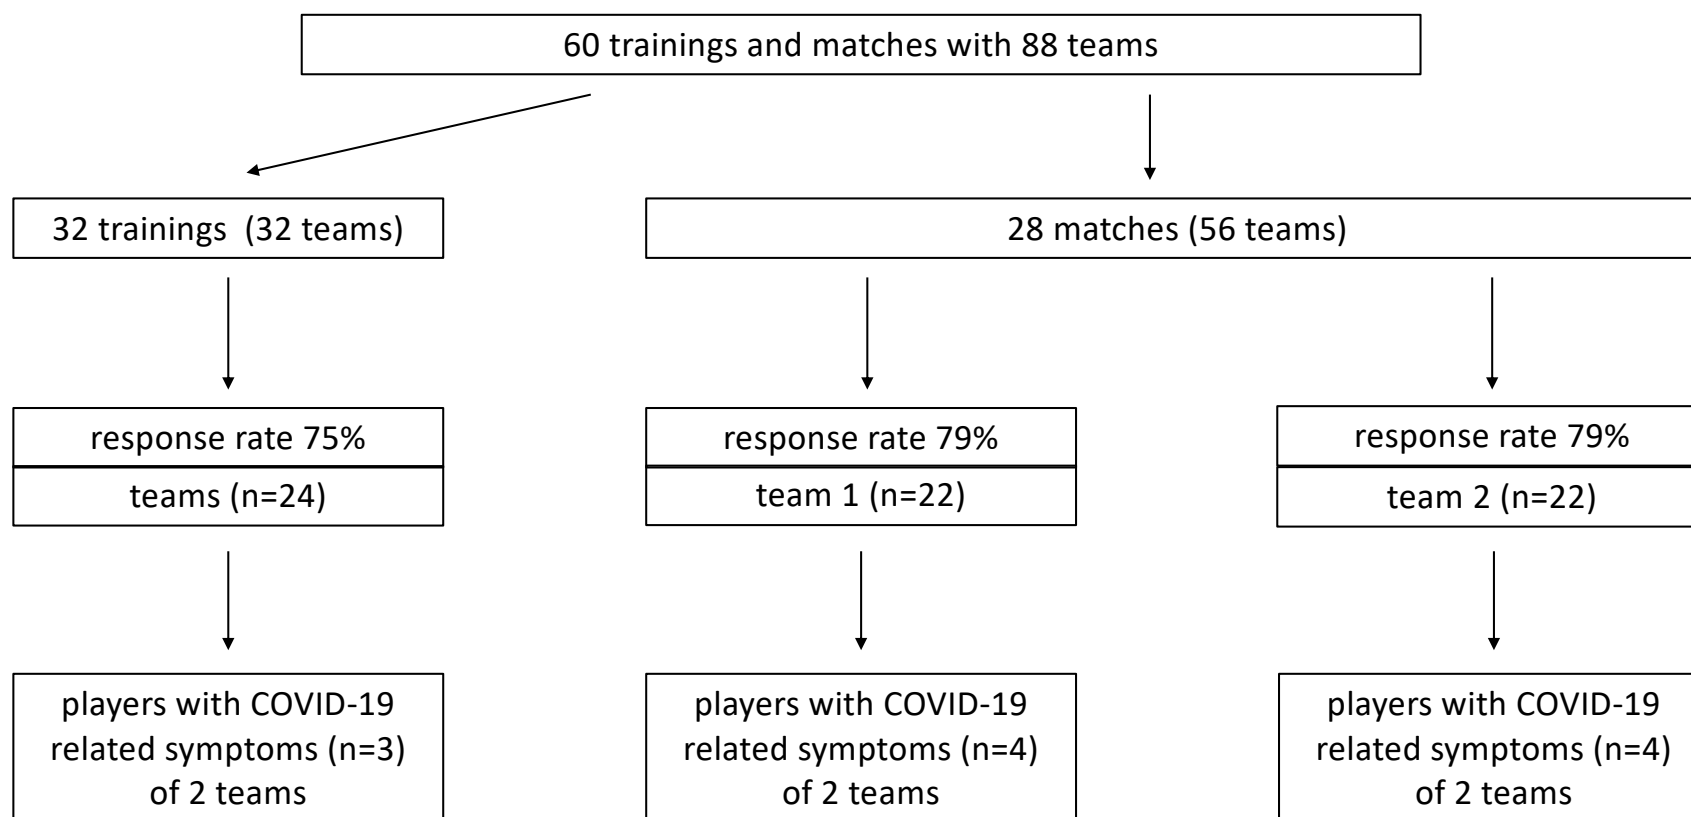

Supplement: bjsports-2021-104441supp003_data_supplement.pdf [file bjsports-2021-104441supp003_data_supplement.pdf]
